# Supplementary material for: Entropy–enthalpy compensation at the single protein level: pH sensing in the bacterial channel OmpF
Source: Royal Society of Chemistry journal article supplement (doi:10.1039/c4nr03811h), 2014-10-23
Supplement: c4nr03811h1.pdf [file c4nr03811h1.pdf]

**[Supplementary material]**

*Temperature effects on solution conductivity and channel conductance*

For a complete characterization of the temperature-dependent electrophysiology, we measured the free solution conductivities as a function of both pH and temperature (Fig. S1).

**(a)**

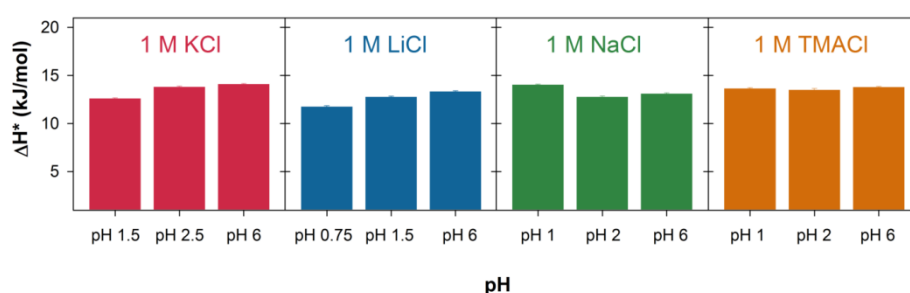

**(b)**

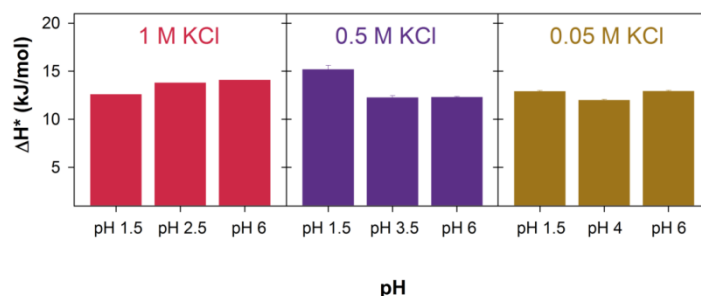

**Figure. S1** Free solution enthalpies  $\Delta H^*$  vs. pH obtained from Eq. (1) for all salts and concentrations under study.

We also show the Eyring plots of the channel conductance in KCl solutions of different concentration and the corresponding activation enthalpies  $\Delta H^*$  at different pH values.

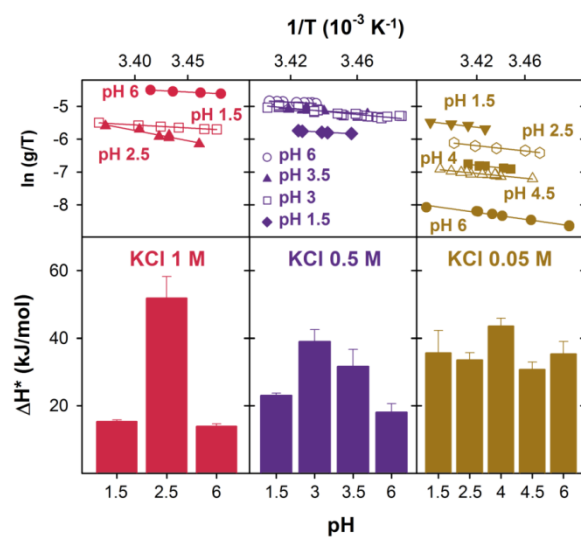

**Figure. S2** Eyring plot of the channel conductance in KCl solutions of different concentration and activation enthalpies  $\Delta H^*$  at different pH values.
